# Supplementary material for: Protocol for Increasing the Sensitivity of MS-Based Protein Detection in Human Chorionic Villi
Source: MDPI journal article supplement (doi:10.3390/cimb44050140), 2022-05-09
Supplement: s1 [file s1]

## Supporting Information

### Protocol for Increasing the Sensitivity of MS-Based Protein

#### Detection in Human Chorionic Villi

Timur Shkrigunov, Pavel Pogodin, Victor Zgoda, Olesya Larina, Yulia Kisrieva, Maria Klimenko, Oleg Latyshkevich, Peter Klimenko, Andrey Lisitsa and Natalia Petushkova

#### In-solution tryptic digestion protocol

##### Reagents:

- **Denaturation Buffer:** 12 mM sodium deoxycholate (DOC), 2 M thiourea, 2.5 mM EDTA, and 75 mM Tris-HCl, pH = 8.5
- **Reduction Solution** (prepare fresh before use): denaturation buffer, 87 mM dithiothreitol (DTT), and 6.7 mM tris(2-carboxyethyl)phosphine (TCEP)
- **Alkylation Solution** (prepare fresh before use, pH < 9.0): denaturation buffer (100 µl), 4-vinylpyridine (10 µl), and *N,N*-dimethylformamide (90 µl)
- **Digestion Buffer** (prepare fresh before use): 100 mM CaCl<sub>2</sub>, 42 mM triethylammonium bicarbonate (TEAB, 42 µl) in H<sub>2</sub>O (water for UV, HPLC, ACS)
- **Trypsin Stock Solution:** 20 ng sequencing grade modified trypsin (Promega, Madison, WI, USA) in 100 µl of manufacture buffer (can be stored at - 40 or - 80°C for several months)
- **Formic acid**

##### Protocol:

1. Transfer the aliquot of urea-based extract (175 µg of protein) to a tube and dry down samples in a Eppendorf Concentrator 5301 (Hamburg, Germany)
2. Add Reduction Solution  
*Use reduction solution in the ratio: reduction solution/total protein weight = 1/1*
3. Incubate at 42°C for 60 min

4. Add Alkylation Solution

*Use alkylation solution in the ratio: alkylation solution/ $V_{probe}$  = 1/12*

5. Incubate at 20°C for 60 min in the dark

6. Add Digestion Buffer (up to 100 µl) and mix

7. Add Trypsin

*Use an enzyme in the ratio: trypsin/total protein weight = 1/100*

8. Incubate at 44°C and 50 rpm for 120 min in a GFL Shaking Incubator 3032 (Burgwedel, Germany) in the dark

9. Add another portion of Trypsin

*Use an enzyme in the ratio: trypsin/total protein weight = 1/100*

10. Incubate at 37°C and 50 rpm for 2 h in a GFL Shaking Incubator 3032 in the dark

11. Add formic acid to a final concentration of 1%

12. Centrifuge for 30 min at 10,000× *g*

13. Transfer the supernatant (5 µl) to Agilent clear glass vial inserts, place it into a Agilent vial and screw a cap

14. Divide the rest of the supernatant into aliquots and stored at -20°C (~ 1 month)
